# Supplementary material for: Genomic Recombination Leading to Decreased Virulence of Group B Streptococcus in a Mouse Model of Adult Invasive Disease
Source: PubMed Central journal article supplement (PMC5039434; doi:10.3390/pathogens5030054), 2016-08-05
Supplement: pathogens-05-00054-s001.pdf [file pathogens-05-00054-s001.pdf]

# Supplementary Materials: Genomic Recombination Leading to Decreased Virulence of Group B *Streptococcus* in a Mouse Model of Adult Invasive Disease

Sarah Teatero, Paul Lemire, Ken Dewar, Jessica Wasserscheid, Cynthia Calzas, Gustavo V. Mallo, Aimin Li, Taryn B.T. Athey, Mariela Segura and Nahuel Fittipaldi

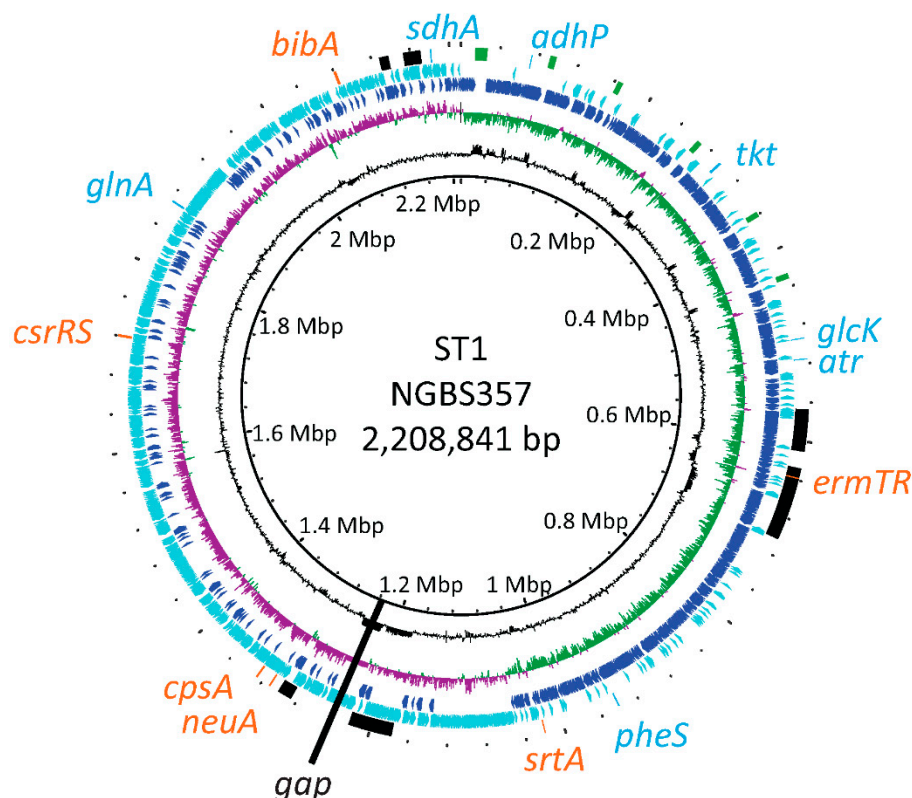

**Figure S1.** Genome atlas of the complete genome of NGBS357 (ST1). Depicted data from innermost to outermost circles represent genome size in Mbp (circle 1), percent G+C content (Circle 2), GC skew, where  $(G-C)/(G+C)$  is averaged over a moving window of 10,000 bp, with excess C shown in green and purple, respectively (circle 3). Circle 4 shows annotated coding sequences (CDSs) on the forward strand (**dark blue**), while circle 5 shows reverse-strand encoded CDSs (**light blue**). Reference landmarks (circle 6): mobile genetic elements, **black**; RNA, **green**; MLST genes, **light blue**; *bibA* (*hvgA* homologue) and other genes of interest, **orange**.

**Table S1.** Whole Genome Sequencing statistics for genome closure.

| Strain  | Accession Number | No. of Reads >3 kb (PacBio) (bp) | Ave. Length of Reads (PacBio) (bp) | Coverage of Final Assemblies (PacBio) | No. of Reads (Illumina) | Length of Reads (Illumina) | Coverage of Final Assemblies (Illumina) | Genome Size            |
|---------|------------------|----------------------------------|------------------------------------|---------------------------------------|-------------------------|----------------------------|-----------------------------------------|------------------------|
| NGBS375 | CP012503         | 62,706                           | 6087                               | 176                                   | 2,250,144               | 150                        | 155                                     | 2,172,875              |
| NGBS357 | CP012504         | 45,296                           | 8119                               | 166                                   | 2,146,206               | 101                        | 98                                      | 2,208,841 <sup>a</sup> |

<sup>a</sup> Size of sequenced contig. Does not include repetitive region.

**Table S2.** Gene content in recombinant region of NGBS375 (ST297).

| Strand | Position (Start End) | Gene         | Product                                                           |
|--------|----------------------|--------------|-------------------------------------------------------------------|
| -      | 1749923 1750483      | <i>efp</i>   | elongation factor P                                               |
| -      | 1751411 1751710      |              | hypothetical protein                                              |
| -      | 1752128 1752358      |              | hypothetical protein                                              |
| -      | 1752371 1752541      |              | hypothetical protein                                              |
| -      | 1752554 1752994      |              | hypothetical protein                                              |
| -      | 1753598 1754050      | <i>comEB</i> | late competence protein required for DNA binding and uptake       |
| -      | 1754062 1755129      |              | X-Pro aminopeptidase                                              |
| -      | 1755229 1755945      |              | membrane protein                                                  |
| -      | 1755947 1757446      |              | EmrB/QacA family drug resistance transporter                      |
| -      | 1757782 1760610      | <i>uvrA</i>  | excinuclease ABC subunit A                                        |
| -      | 1760742 1761413      |              | hypothetical protein                                              |
| -      | 1761438 1762382      |              | magnesium transporter CorA family protein                         |
| -      | 1762552 1762791      | <i>rpsR</i>  | 30S ribosomal protein S18                                         |
| -      | 1762959 1764278      |              | prophage LambdaSa1, reverse transcriptase/maturase family protein |
| -      | 1764859 1765350      | <i>ssb-3</i> | single-stranded DNA-binding protein                               |
| -      | 1765362 1765649      | <i>rpsF</i>  | 30S ribosomal protein S6                                          |
| +      | 1766743 1767867      | <i>mutY</i>  | A/G-specific adenine DNA glycosylase                              |
| +      | 1768044 1768637      |              | transcriptional regulator                                         |
| -      | 1768683 1768997      | <i>trx</i>   | thioredoxin                                                       |
| -      | 1769078 1769578      |              | phosphatidylglycerophosphatase B                                  |
| -      | 1769582 1771921      | <i>mutS2</i> | DNA mismatch repair protein mutS                                  |
| -      | 1772006 1772548      |              | CvpA family protein                                               |
| -      | 1772551 1772862      |              | Cell division protein ZapA                                        |
| +      | 1772988 1773866      | <i>rmhC</i>  | ribonuclease HIII                                                 |
| +      | 1773882 1774475      |              | signal peptidase I                                                |
| +      | 1774604 1777024      |              | helicase                                                          |
| +      | 1777138 1777620      |              | membrane protein                                                  |
| -      | 1777691 1778800      | <i>dinP</i>  | DNA polymerase IV                                                 |
| +      | 1778970 1781282      | <i>pfl</i>   | pyruvate formate-lyase                                            |
| +      | 1781383 1781580      |              | FMN-binding protein                                               |
| +      | 1781577 1781756      |              | FMN-binding protein                                               |
| -      | 1781791 1782720      |              | beta-lactamase                                                    |
| -      | 1782717 1783472      |              | C3-degrading proteinase                                           |
| +      | 1783597 1784493      |              | membrane protein                                                  |
| -      | 1784572 1785420      |              | glycerol uptake facilitator protein                               |
| -      | 1785588 1786040      |              | universal stress protein                                          |
| -      | 1786058 1787260      |              | transporter                                                       |
| +      | 1787416 1788075      |              | Crp/Fnr family transcriptional regulator                          |
| +      | 1788099 1790384      | <i>pepX</i>  | x-prolyl-dipeptidyl aminopeptidase                                |
| +      | 1790388 1790747      |              | hypothetical protein                                              |
| +      | 1790793 1791773      |              | polyprenyl synthetase                                             |
| -      | 1791858 1793606      | <i>cydC</i>  | ABC transporter ATP-binding protein                               |
| -      | 1793599 1795317      |              | ABC transporter ATP-binding protein                               |
| -      | 1795317 1796336      | <i>cydB</i>  | cytochrome d ubiquinol oxidase, subunit II                        |
| -      | 1796337 1797764      | <i>cydA</i>  | cytochrome d oxidase subunit I                                    |
| -      | 1797867 1799075      |              | pyridine nucleotide-disulfide oxidoreductase family protein       |
| -      | 1799088 1799987      |              | 1,4-dihydroxy-2-naphthoate octaprenyltransferase                  |
| -      | 1800396 1800923      |              | hypothetical protein                                              |
| +      | 1801885 1802184      |              | YbaB/EbfC family DNA-binding protein                              |
| +      | 1802344 1803534      | <i>cfa</i>   | cyclopropane-fatty-acyl-phospholipid synthase                     |
| -      | 1804069 1804329      |              | MerR family transcriptional regulator                             |
| -      | 1804456 1805043      |              | DNA polymerase III subunit epsilon                                |
| -      | 1805087 1805623      |              | transcriptional regulator OrfX                                    |
| +      | 1805758 1806930      |              | putative flavoprotein                                             |

|   |                 |               |                                                                   |
|---|-----------------|---------------|-------------------------------------------------------------------|
| - | 1806974 1807738 |               | hypothetical protein                                              |
| + | 1807915 1808184 | <i>rpsN_2</i> | 30S ribosomal protein S14                                         |
| - | 1808545 1809570 | <i>ltaE</i>   | threonine aldolase                                                |
| - | 1809690 1810700 |               | DNA-binding/iron metalloprotein/AP endonuclease                   |
| - | 1810776 1811183 |               | ribosomal-protein-alanine acetyltransferase                       |
| - | 1811185 1811877 |               | M22 peptidase                                                     |
| + | 1812056 1812286 |               | hypothetical protein                                              |
| + | 1812340 1814019 |               | Zn-dependent hydrolase                                            |
| - | 1814177 1814686 |               | CHAP domain-containing protein                                    |
| - | 1814834 1816180 | <i>glnA</i>   | glutamine synthetase, type I                                      |
| - | 1816214 1816585 | <i>glnR</i>   | GlnR family transcriptional regulator                             |
| - | 1816665 1817204 |               | signal peptide containing protein                                 |
| - | 1817467 1818663 | <i>pgk</i>    | phosphoglycerate kinase                                           |
| - | 1818798 1819667 |               | acid phosphatase                                                  |
| - | 1819876 1820886 | <i>gapA</i>   | glyceraldehyde-3-phosphate dehydrogenase                          |
| - | 1821090 1823168 | <i>fusA</i>   | elongation factor G                                               |
| - | 1823323 1823793 | <i>rpsG</i>   | 30S ribosomal protein S7                                          |
| - | 1823815 1824228 | <i>rpsL</i>   | 30S ribosomal protein S12                                         |
| - | 1824447 1825259 | <i>purR</i>   | pur operon repressor                                              |
| - | 1825356 1826297 |               | HD domain-containing protein                                      |
| - | 1826287 1827561 |               | RmuC domain-containing protein                                    |
| - | 1827563 1828195 |               | thiamine pyrophosphokinase                                        |
| - | 1828188 1828850 | <i>rpe</i>    | ribulose-phosphate 3-epimerase                                    |
| - | 1828857 1829729 |               | ribosome-associated GTPase                                        |
| - | 1829885 1830736 |               | rRNA (guanine-N1-)-methyltransferase                              |
| - | 1830740 1831612 | <i>ksgA</i>   | dimethyladenosine transferase                                     |
| - | 1831692 1832054 |               | hypothetical protein                                              |
| - | 1832202 1832762 |               | primase-like protein                                              |
| - | 1832749 1833603 |               | TatD family deoxyribonuclease                                     |
| - | 1833713 1833985 |               | hypothetical protein                                              |
| - | 1834004 1834396 |               | hypothetical protein                                              |
| - | 1834387 1835679 |               | lipase                                                            |
| - | 1835679 1836071 |               | membrane protein                                                  |
| - | 1836246 1837508 | <i>dltD</i>   | dltD protein                                                      |
| - | 1837501 1837740 | <i>dltC</i>   | D-alanine--poly(phosphoribitol) ligase subunit 2                  |
| - | 1837755 1839020 | <i>dltB</i>   | dltB protein                                                      |
| - | 1839017 1840552 | <i>dltA</i>   | D-alanine--poly(phosphoribitol) ligase subunit 1                  |
| - | 1840565 1840687 | <i>dltX</i>   | D-Ala-teichoic acid biosynthesis protein DltX                     |
| - | 1840698 1841885 |               | sensor histidine kinase                                           |
| - | 1841885 1842559 |               | DNA-binding response regulator                                    |
| - | 1842915 1843049 | <i>rpmH</i>   | 50S ribosomal protein L34                                         |
| - | 1843233 1844588 |               | Nucleoside recognition                                            |
| + | 1844820 1845986 |               | IS30 family transposase                                           |
| - | 1846281 1848008 |               | amino acid ABC transporter permease                               |
| - | 1848027 1849250 |               | amino acid ABC transporter ATP-binding protein                    |
| - | 1849627 1852005 | <i>xfp</i>    | phosphoketolase                                                   |
| - | 1852095 1853186 |               | L-ascorbate 6-phosphate lactonase                                 |
| - | 1853503 1855182 |               | BglG family transcriptional antiterminator                        |
| - | 1855248 1856009 |               | Xylose isomerase-like TIM barrel                                  |
| - | 1856029 1857546 |               | carbohydrate kinase                                               |
| - | 1857612 1858601 |               | putative metal-dependent hydrolase of the TIM-barrel fold protein |
| - | 1858623 1860074 |               | PTS system transporter subunit IIC                                |
| - | 1860172 1861128 |               | glyoxylate reductase, NADH-dependent                              |
| - | 1861147 1862166 |               | hypothetical protein                                              |
| - | 1862401 1863384 |               | LacI family sugar-binding transcriptional regulator               |
| - | 1863547 1864194 |               | transaldolase                                                     |
| - | 1864205 1864921 | <i>araD</i>   | L-ribulose-5-phosphate 4-epimerase                                |

|   |                 |               |                                                                     |
|---|-----------------|---------------|---------------------------------------------------------------------|
| - | 1864923 1865786 |               | L-xylulose 5-phosphate 3-epimerase                                  |
| - | 1865790 1866455 | <i>ulaD</i>   | 3-keto-L-gulonate-6-phosphate decarboxylase                         |
| - | 1866568 1867053 |               | PTS system transporter subunit IIA                                  |
| - | 1867120 1867398 |               | PTS system 3-keto-L-gulonate specific transporter subunit IIB       |
| - | 1867426 1868865 | <i>ulaA_2</i> | PTS system ascorbate-specific transporter subunit IIC               |
| - | 1869033 1869650 |               | membrane protein                                                    |
| + | 1869827 1870282 |               | hypothetical protein                                                |
| - | 1870305 1871597 | <i>purA</i>   | adenylosuccinate synthetase                                         |
| - | 1871967 1872989 | <i>pfoR</i>   | perfringolysin O regulator protein                                  |
| + | 1873351 1874025 |               | DNA-binding protein                                                 |
| + | 1874195 1876447 |               | bifunctional glutamate--cysteine                                    |
| + | 1876571 1877389 |               | membrane protein                                                    |
| + | 1877386 1878642 |               | toxic anion resistance protein                                      |
| + | 1878782 1879657 | <i>hslO</i>   | heat shock protein 33                                               |
| + | 1879641 1880618 |               | NifR3/Smm1 family protein                                           |
| + | 1880739 1881380 |               | deoxynucleoside kinase family protein                               |
| + | 1881394 1881885 | <i>pat</i>    | phosphinothricin <i>N</i> -acetyltransferase                        |
| - | 1882105 1884552 |               | ATP-dependent Clp protease, ATP-binding subunit                     |
| - | 1884549 1885013 | <i>ctsR</i>   | CtsR family transcriptional regulator                               |
| + | 1885186 1885647 | <i>qacE</i>   | putative small multi-drug export                                    |
| - | 1885806 1886846 | <i>tsf</i>    | elongation factor Ts                                                |
| - | 1886940 1887710 | <i>rs2</i>    | 30S ribosomal protein S2                                            |
| + | 1887987 1888547 | <i>ahpC</i>   | alkyl hydroperoxide reductase                                       |
| + | 1888565 1890097 | <i>ahpF</i>   | alkyl hydroperoxide reductase                                       |
| + | 1890231 1890301 |               | tRNA-Cys                                                            |
| - | 1890374 1892443 |               | Na <sup>+</sup> /H <sup>+</sup> exchanger family protein            |
| - | 1892445 1892681 |               | hypothetical protein                                                |
| + | 1892848 1893801 |               | microcin immunity protein MccF                                      |
| - | 1893851 1895746 | <i>pepO_2</i> | endopeptidase O                                                     |
| + | 1895894 1896877 |               | Gfo/Idh/MocA family oxidoreductase                                  |
| - | 1896923 1898086 |               | putative inositol transporter 2                                     |
| + | 1898198 1898842 |               | cyclic nucleotide-binding protein                                   |
| + | 1898908 1899522 | <i>def</i>    | peptide deformylase                                                 |
| - | 1899594 1900595 | <i>regR</i>   | RegR family transcriptional regulator                               |
| - | 1900675 1902579 |               | oligohyaluronate lyase                                              |
| - | 1902659 1903474 |               | PTS system transporter subunit IID                                  |
| - | 1903461 1904327 |               | PTS system transporter subunit IIC                                  |
| - | 1904363 1904857 |               | PTS system transporter subunit IIB                                  |
| - | 1904912 1906108 |               | glucuronyl hydrolase                                                |
| - | 1906111 1906545 |               | PTS system transporter subunit IIA                                  |
| + | 1906823 1907635 |               | gluconate 5-dehydrogenase                                           |
| + | 1907652 1908290 |               | ribose/galactose isomerase                                          |
| + | 1908316 1909323 |               | carbohydrate kinase                                                 |
| + | 1909335 1909973 | <i>eda-2</i>  | keto-hydroxyglutarate-aldolase/keto-deoxy-phosphogluconate aldolase |
| + | 1911036 1912532 |               | ribonucleases G and E                                               |
| - | 1912704 1913318 |               | nitroreductase family protein                                       |
| - | 1913451 1913876 |               | MarR family transcriptional regulator                               |
| - | 1914003 1918409 | <i>polC</i>   | DNA polymerase III PolC                                             |
| - | 1918532 1919116 |               | <i>N</i> -acetylmuramoyl-L-alanine amidase                          |
| - | 1919241 1921094 | <i>proS</i>   | prolyl-tRNA synthetase                                              |
| - | 1921186 1922445 |               | zinc metalloprotease                                                |
| - | 1922476 1923270 | <i>cdsA</i>   | phosphatidate cytidyltransferase                                    |
| - | 1923285 1924037 | <i>uppS</i>   | undecaprenyl pyrophosphate synthase                                 |
| - | 1924204 1924545 | <i>yajC</i>   | preprotein translocase subunit YajC                                 |
| - | 1924622 1924966 |               | bacterocin transport accessory protein                              |
| - | 1925157 1926320 |               | malate oxidoreductase                                               |
| - | 1926345 1927682 |               | CCS family citrate carrier protein                                  |

|   |         |         |               |                                                                                             |
|---|---------|---------|---------------|---------------------------------------------------------------------------------------------|
| + | 1927836 | 1929362 |               | sensor histidine kinase                                                                     |
| + | 1929364 | 1930044 |               | response regulator                                                                          |
| - | 1930065 | 1931060 | <i>galE</i>   | UDP-glucose 4-epimerase                                                                     |
| - | 1931148 | 1932755 | <i>dexB</i>   | glucan 1,6- $\alpha$ -glucosidase                                                           |
| - | 1932884 | 1934017 |               | sugar ABC transporter ATP-binding protein                                                   |
| - | 1934118 | 1934969 |               | helix-turn-helix domain-containing protein                                                  |
| - | 1935064 | 1935960 |               | aldolase 1 epimerase LacX                                                                   |
| - | 1936014 | 1936991 | <i>lacD</i>   | tagatose 1,6-diphosphate aldolase                                                           |
| - | 1936993 | 1937802 | <i>lacC_1</i> | tagatose-6-phosphate kinase                                                                 |
| - | 1937884 | 1938717 |               | IS861, transposase OrfB                                                                     |
| - | 1938693 | 1939229 |               | IS861, transposase OrfA                                                                     |
| - | 1939262 | 1939360 | <i>lacC_2</i> | tagatose-6-phosphate kinase                                                                 |
| - | 1939371 | 1939886 | <i>lacB</i>   | galactose-6-phosphate isomerase subunit LacB                                                |
| - | 1939984 | 1940331 | <i>lacA</i>   | galactose-6-phosphate isomerase subunit LacA                                                |
| - | 1940580 | 1943030 |               | neuraminidase-like protein                                                                  |
| - | 1943381 | 1943758 |               | PTS system transporter subunit IIC                                                          |
| - | 1943798 | 1944103 |               | PTS system transporter subunit IIB                                                          |
| - | 1944105 | 1944569 |               | PTS system transporter subunit IIA                                                          |
| + | 1944787 | 1945563 | <i>lacR-2</i> | lactose phosphotransferase system repressor                                                 |
| - | 1945844 | 1948426 |               | streptococcal histidine triad family protein                                                |
| - | 1948453 | 1949376 |               | adhesion lipoprotein                                                                        |
| - | 1949631 | 1950074 |               | D-tyrosyl-tRNA(Tyr) deacylase                                                               |
| - | 1950084 | 1952300 |               | GTP pyrophosphokinase                                                                       |
| + | 1952560 | 1954962 | <i>cpdB</i>   | bifunctional 2',3'-cyclic nucleotide 2'-phosphodiesterase/3'-nucleotidase precursor protein |
| + | 1955119 | 1955574 | <i>nrdI-2</i> | flavoprotein NrdI                                                                           |
| + | 1955585 | 1956622 |               | M42 family peptidase                                                                        |
| + | 1956622 | 1957119 |               | polynucleotide kinase                                                                       |
| + | 1957176 | 1957295 |               | hypothetical protein                                                                        |
| - | 1957341 | 1958378 |               | iron ABC transporter substrate-binding protein                                              |
| - | 1958390 | 1959163 |               | DNA-binding response regulator                                                              |
| - | 1959167 | 1960816 | <i>yesM</i>   | two-component sensor kinase YesM                                                            |
| - | 1960954 | 1961781 |               | phosphotransferase system (PTS), enzyme II component D                                      |
| - | 1961778 | 1962587 |               | PTS system transporter subunit IIC                                                          |
| - | 1962591 | 1963094 |               | PTS system transporter subunit IIB                                                          |
| - | 1963112 | 1963537 |               | PTS system transporter subunit IIA                                                          |
| - | 1963784 | 1964818 | <i>alr_2</i>  | alanine racemase                                                                            |
| - | 1965047 | 1966201 |               | membrane protein                                                                            |
| - | 1966207 | 1967055 |               | ABC transporter ATP-binding protein                                                         |
| + | 1967586 | 1967768 |               | ABC transporter ATP-binding protein                                                         |
| - | 1967839 | 1969173 | <i>rgfC</i>   | histidine kinase                                                                            |
| - | 1969170 | 1969922 |               | response regulator                                                                          |
| - | 1970138 | 1970953 |               | endonuclease/exonuclease/phosphatase family protein                                         |
| - | 1971007 | 1973190 |               | PTS system transporter subunit IIABC                                                        |
| - | 1973345 | 1975000 |               | sensor histidine kinase                                                                     |
| - | 1974993 | 1975670 | <i>phoB</i>   | phosphate regulon response regulator PhoB                                                   |
| - | 1975670 | 1976326 | <i>phoU</i>   | phosphate transport system regulatory protein PhoU                                          |
| - | 1976323 | 1977072 |               | phosphate transporter ATP-binding protein                                                   |
| - | 1977065 | 1977943 |               | phosphate ABC transporter permease                                                          |
| - | 1977945 | 1978790 |               | phosphate ABC transporter permease                                                          |
| - | 1978805 | 1979686 |               | hemolysin                                                                                   |
| - | 1979887 | 1980171 |               | hypothetical protein                                                                        |
| - | 1980168 | 1980473 |               | hypothetical protein                                                                        |
| - | 1980470 | 1981210 |               | 16S ribosomal RNA methyltransferase RsmE                                                    |
| - | 1981210 | 1982163 | <i>prmA</i>   | 50S ribosomal protein L11 methyltransferase                                                 |
| - | 1982160 | 1982468 |               | MepB protein                                                                                |
| + | 1982742 | 1983458 |               | MerR family transcriptional regulator                                                       |
| - | 1983497 | 1983967 |               | acetyltransferase                                                                           |

|   |                 |               |                                                                                        |
|---|-----------------|---------------|----------------------------------------------------------------------------------------|
| - | 1983939 1984397 |               | MutT/nudix family protein                                                              |
| - | 1984533 1985003 |               | hypothetical protein                                                                   |
| + | 1985345 1985821 |               | acetyltransferase                                                                      |
| + | 1985814 1987082 |               | recombination factor protein RarA                                                      |
| + | 1987364 1987436 |               | tRNA-Lys                                                                               |
| - | 1987625 1987930 |               | hypothetical protein                                                                   |
| - | 1987914 1988315 |               | hypothetical protein                                                                   |
| - | 1988303 1989520 |               | lipase                                                                                 |
| - | 1989557 1989943 |               | membrane protein                                                                       |
| - | 1990114 1990623 |               | hypothetical protein                                                                   |
| - | 1990625 1990957 |               | membrane protein                                                                       |
| - | 1991217 1991537 |               | hypothetical protein                                                                   |
| - | 1991776 1992630 |               | streptomycin resistance protein                                                        |
| - | 1992809 1993201 |               | hypothetical protein                                                                   |
| - | 1993643 1994251 |               | membrane protein                                                                       |
| - | 1994238 1994573 |               | PadR family transcriptional regulator                                                  |
| - | 1995095 1995583 |               | acetyltransferase                                                                      |
| - | 1995752 1996513 | <i>yxIG</i>   | putative transmembrane protein YxIG                                                    |
| - | 1996510 1997412 |               | ABC transporter ATP-binding protein                                                    |
| - | 1997409 1997615 |               | hypothetical protein                                                                   |
| - | 1997617 1998693 |               | Cro/CI family transcriptional regulator                                                |
| - | 1998938 1999771 |               | IS861, transposase OrfB                                                                |
| - | 1999747 2000283 |               | IS861, transposase OrfA                                                                |
| - | 2000377 2000991 |               | PAP2 family protein                                                                    |
| + | 2001205 2001522 |               | MagZ family protein                                                                    |
| + | 2001519 2002079 |               | decarboxylase                                                                          |
| + | 2002384 2003247 |               | protease                                                                               |
| - | 2003404 2003706 |               | rhodanese-like domain-containing protein                                               |
| - | 2003879 2004646 | <i>cfb</i>    | cAMP factor                                                                            |
| + | 2005416 2005955 |               | topology modulation protein                                                            |
| + | 2006156 2007241 |               | glycerol dehydrogenase                                                                 |
| - | 2007406 2008113 |               | cyclic nucleotide-binding protein                                                      |
| - | 2008460 2010304 |               | bifunctional homocysteine S-methyltransferase/5,10-methylenetetrahydrofolate reductase |
| - | 2010349 2012586 | <i>metE</i>   | 5-methyltetrahydropteroyltriglutamate—homocysteine S-methyltransferase                 |
| - | 2012956 2013279 | <i>azlD</i>   | branched-chain amino acid transport                                                    |
| - | 2013269 2013961 | <i>azlC</i>   | branched-chain amino acid transport protein AzlC                                       |
| + | 2014284 2018999 | <i>cspA</i>   | cell surface serine endopeptidase CspA                                                 |
| + | 2019232 2019633 |               | DNA-binding response regulator                                                         |
| + | 2019684 2019917 |               | DNA-binding response regulator                                                         |
| + | 2020046 2021302 |               | sensor histidine kinase                                                                |
| + | 2021395 2022003 |               | hypothetical protein                                                                   |
| - | 2022093 2024594 | <i>leuS</i>   | leucyl-tRNA synthetase                                                                 |
| + | 2024810 2025976 |               | IS30 family transposase                                                                |
| + | 2026418 2027665 |               | major facilitator family protein                                                       |
| - | 2027708 2028553 |               | alpha-beta hydrolase superfamily esterase                                              |
| + | 2028758 2029954 |               | glycosyl transferase family protein                                                    |
| + | 2030019 2031224 |               | glycosyl transferase family protein                                                    |
| - | 2031271 2031810 | <i>nusG</i>   | transcription antitermination protein NusG                                             |
| - | 2032016 2033800 | <i>hvgA</i>   | peptidoglycan linked protein                                                           |
| + | 2033928 2034311 |               | transposase protein A                                                                  |
| + | 2034344 2034733 |               | transposase protein B                                                                  |
| - | 2034975 2035148 | <i>secE</i>   | preprotein translocase subunit SecE                                                    |
| - | 2035184 2035336 | <i>rpmG_1</i> | 50S ribosomal protein L33                                                              |
| - | 2035385 2037706 | <i>pbp2A</i>  | penicillin-binding protein 2A                                                          |
| + | 2037750 2038634 |               | ribosomal large subunit pseudouridine synthase D                                       |
| - | 2038659 2040299 |               | SPBc2 prophage-derived transglycosylase YomI                                           |

|   |                 |               |                                                                    |
|---|-----------------|---------------|--------------------------------------------------------------------|
| - | 2040469 2041680 | <i>deoB_2</i> | phosphopentomutase                                                 |
| - | 2041747 2042418 | <i>deoC</i>   | deoxyribose-phosphate aldolase                                     |
| - | 2042448 2043650 | <i>nupC</i>   | nucleoside permease nupC                                           |
| - | 2043671 2044450 | <i>udp</i>    | uridine phosphorylase                                              |
| + | 2044610 2045347 |               | GntR family transcriptional regulator                              |
| + | 2045360 2045656 |               | hypothetical protein                                               |
| - | 2045756 2047378 | <i>groEL</i>  | Chaperonin GroEL (HSP60 family)                                    |
| - | 2047474 2047758 | <i>groES</i>  | co-chaperonin GroES                                                |
| - | 2047933 2048736 |               | ABC transporter ATP-binding protein                                |
| - | 2048741 2049637 |               | ABC transporter permease                                           |
| - | 2049653 2050615 |               | ABC transporter substrate-binding protein                          |
| - | 2051080 2051877 |               | HAD superfamily hydrolase                                          |
| + | 2052063 2052923 |               | glyoxylase                                                         |
| + | 2052966 2053697 |               | YaaA-like protein                                                  |
| - | 2054054 2054671 | <i>nrdG</i>   | anaerobic ribonucleoside-triphosphate reductase activating protein |
| - | 2054744 2055235 |               | acetyltransferase                                                  |
| - | 2055244 2056176 |               | virulence factor MviM                                              |
| - | 2056189 2056332 |               | hypothetical protein                                               |
| - | 2056407 2058605 |               | anaerobic ribonucleoside triphosphate reductase                    |
| - | 2058704 2060245 | <i>ccs4</i>   | Competence-induced protein Ccs4                                    |

---



**Table S3.** Unique gene clusters found in NGBS375 (ST297).

| <b>Strand</b> | <b>Start</b> | <b>End</b> | <b>Gene</b> | <b>Product</b>                                      |
|---------------|--------------|------------|-------------|-----------------------------------------------------|
| -             | 516248       | 516799     |             | phage protein                                       |
| -             | 516817       | 517203     |             | phage protein                                       |
| -             | 517207       | 517554     |             | Cro/CI family phage transcriptional regulator       |
| +             | 517850       | 518095     |             | phage protein                                       |
| -             | 518046       | 518834     |             | phage membrane protein                              |
| +             | 518885       | 519076     |             | phage DNA-binding protein                           |
| +             | 519156       | 519467     |             | phage protein                                       |
| +             | 519615       | 519842     |             | phage protein                                       |
| +             | 519835       | 520065     |             | hypothetical protein                                |
| +             | 520049       | 521368     |             | chromosome segregation ATPases                      |
| +             | 521383       | 522456     |             | phage protein                                       |
| +             | 522552       | 523157     |             | phage protein                                       |
| +             | 523157       | 523765     |             | hypothetical protein                                |
| +             | 523762       | 525354     |             | DNA/RNA helicase                                    |
| +             | 525363       | 525560     |             | hypothetical protein                                |
| -             | 525553       | 525804     |             | hypothetical protein                                |
| +             | 525875       | 528154     |             | ATPase                                              |
| +             | 528524       | 528721     |             | phage protein                                       |
| +             | 528748       | 529146     |             | phage protein                                       |
| +             | 529143       | 529358     |             | phage associated protein                            |
| +             | 529355       | 529591     |             | phage protein                                       |
| +             | 529821       | 530153     |             | hypothetical protein                                |
| +             | 530231       | 530644     |             | phage protein                                       |
| +             | 530765       | 531196     |             | Phage terminase small subunit                       |
| +             | 531186       | 532466     |             | terminase large subunit                             |
| +             | 532481       | 534010     |             | phage portal protein                                |
| +             | 533976       | 535418     |             | phage protein                                       |
| +             | 535518       | 535634     |             | phage membrane protein                              |
| +             | 535639       | 535842     |             | phage protein                                       |
| +             | 535985       | 536554     |             | phage protein                                       |
| +             | 536573       | 537469     |             | phage protein                                       |
| +             | 537475       | 537831     |             | phage protein                                       |
| +             | 537842       | 538120     |             | phage protein                                       |
| +             | 538117       | 538461     |             | phage protein                                       |
| +             | 538465       | 538824     |             | phage protein                                       |
| +             | 538836       | 539468     |             | phage major tail protein                            |
| +             | 539519       | 539974     |             | phage protein                                       |
| +             | 540049       | 540279     |             | phage protein                                       |
| +             | 540308       | 544534     |             | phage minor tail protein                            |
| +             | 544547       | 545389     |             | phage protein                                       |
| +             | 545402       | 549229     |             | phage protein                                       |
| +             | 549238       | 549390     |             | hypothetical protein                                |
| +             | 549401       | 549817     |             | phage protein                                       |
| +             | 549817       | 550041     |             | hypothetical protein                                |
| +             | 550051       | 550347     |             | phage membrane protein                              |
| +             | 551747       | 552706     |             | abortive infection bacteriophage resistance protein |
| +             | 619252       | 619533     |             | membrane protein                                    |
| +             | 620391       | 621242     |             | DNA replication protein                             |
| +             | 621239       | 621724     |             | hypothetical protein                                |
| +             | 621721       | 623505     |             | type IV secretory pathway protein VirD4             |

|   |         |         |               |                                                                   |
|---|---------|---------|---------------|-------------------------------------------------------------------|
| + | 623559  | 623690  |               | hypothetical protein                                              |
| + | 623671  | 623982  |               | single-strand binding protein                                     |
| + | 623986  | 624117  |               | conjugative transposon membrane protein                           |
| + | 624845  | 626722  |               | prophage LambdaSa1, reverse transcriptase/maturase family protein |
| + | 626992  | 627855  |               | membrane protein                                                  |
| + | 627870  | 628136  |               | hypothetical protein                                              |
| + | 628441  | 630870  |               | conjugal transfer protein                                         |
| + | 630875  | 633007  |               | membrane protein                                                  |
| + | 633020  | 633256  |               | hypothetical protein                                              |
| + | 633234  | 635420  |               | membrane protein                                                  |
| + | 635518  | 637224  |               | DNA topoisomerase                                                 |
| + | 637306  | 638841  |               | transcriptional regulator                                         |
| + | 638924  | 647680  |               | helicase                                                          |
| + | 647723  | 648382  |               | conjugative transposon protein                                    |
| + | 648811  | 649584  |               | ABC transporter ATP-binding protein                               |
| + | 649574  | 651628  |               | putative ABC transporter                                          |
| + | 651661  | 652344  |               | DNA-binding response regulator                                    |
| + | 652334  | 653332  |               | signal transduction histidine kinase                              |
| - | 653364  | 654695  |               | relaxase/mobilisation protein                                     |
| - | 654698  | 655054  |               | conjugative transposon mobilization protein                       |
| + | 655468  | 656745  |               | transposase                                                       |
| + | 657017  | 657988  |               | AraC family transcriptional regulator                             |
| + | 658151  | 658753  | <i>eqbH</i>   | ABC transporter permease                                          |
| + | 658757  | 659443  |               | cobalt ABC transporter permease                                   |
| + | 659458  | 660924  | <i>eqbJ</i>   | ABC transporter ATP-binding protein                               |
| + | 660940  | 662649  | <i>eqbK</i>   | ABC transporter ATP-binding protein                               |
| + | 662650  | 664395  |               | ABC transporter ATP-binding protein                               |
| + | 664421  | 665773  |               | Na <sup>+</sup> driven multidrug efflux pump                      |
| + | 666087  | 666497  |               | DNA-binding protein                                               |
| + | 666958  | 667104  |               | hypothetical protein                                              |
| + | 667166  | 668953  |               | resolvase family site-specific recombinase                        |
| - | 670192  | 671409  |               | Tn916, transposase                                                |
| - | 671491  | 671694  |               | Tn916, excisionase                                                |
| - | 683937  | 684158  |               | Tn916 hypothetical protein                                        |
| + | 778487  | 779278  |               | proteinase                                                        |
| + | 1091341 | 1092285 |               | ABC transporter substrate-binding protein                         |
| + | 1092282 | 1093004 |               | ABC transporter substrate-binding protein                         |
| - | 1172486 | 1172656 |               | fibrinogen-binding protein                                        |
| - | 2035184 | 2035336 | <i>rpmG_1</i> | 50S ribosomal protein L33                                         |
| - | 2080949 | 2081470 |               | cytoplasmic protein                                               |
| - | 2081568 | 2083052 |               | phage integrase family site specific recombinase                  |
| - | 2083062 | 2083310 |               | excisionase                                                       |
| - | 2083376 | 2084404 |               | replication initiation factor                                     |
| - | 2084407 | 2084838 |               | hypothetical protein                                              |
| - | 2085114 | 2085569 |               | hypothetical protein                                              |
| - | 2085569 | 2085784 |               | hypothetical protein                                              |
| + | 2086107 | 2087027 |               | Cro/CI family transcriptional regulator                           |
| + | 2087048 | 2088169 |               | phage protein, Fic family                                         |
| + | 2088274 | 2089083 |               | hypothetical protein                                              |

Table S4. Unique genes in NGBS128 (ST17).

| Strand | Start   | End     | Gene          | Product                                                     |
|--------|---------|---------|---------------|-------------------------------------------------------------|
| +      | 66832   | 68076   |               | phage protein                                               |
| +      | 68208   | 69053   |               | hypothetical protein                                        |
| +      | 80534   | 81196   | <i>thrC_2</i> | threonine synthase                                          |
| +      | 104048  | 104479  |               | lipoprotein                                                 |
| +      | 104903  | 105343  |               | lipoprotein                                                 |
| +      | 105336  | 105680  |               | hypothetical protein                                        |
| -      | 130075  | 131241  |               | IS30 family transposase                                     |
| +      | 155924  | 156325  |               | membrane protein                                            |
| -      | 181915  | 182418  |               | deoxyribonuclease                                           |
| -      | 182757  | 182945  |               | hypothetical protein                                        |
| +      | 195707  | 196078  | <i>cglA</i>   | competence protein CglA                                     |
| +      | 197612  | 197779  |               | hypothetical protein                                        |
| +      | 198046  | 198213  |               | late competence protein ComGG                               |
| +      | 237415  | 237537  |               | transcriptional regulator                                   |
| -      | 239957  | 240475  |               | immunity repressor protein                                  |
| +      | 240913  | 241752  |               | gp49 bacteriophage-like protein                             |
| +      | 241805  | 242104  |               | bacterial mobilization protein                              |
| +      | 242112  | 242444  |               | mobilisation protein                                        |
| +      | 242425  | 242619  |               | hypothetical protein                                        |
| +      | 242931  | 243620  |               | methylase                                                   |
| +      | 243625  | 247995  |               | type II restriction endonuclease                            |
| +      | 248155  | 251910  | <i>yobI</i>   | DNA-binding protein                                         |
| +      | 251936  | 253378  |               | putative transcriptional regulator                          |
| +      | 254241  | 254462  |               | MutR family transcriptional regulator                       |
| +      | 270599  | 270829  |               | acetyltransferase                                           |
| -      | 297413  | 297901  |               | PTS system transporter subunit IIBC                         |
| +      | 354142  | 354414  |               | competence protein F                                        |
| +      | 435763  | 436080  |               | protease                                                    |
| -      | 462328  | 462576  |               | acetate kinase                                              |
| -      | 462610  | 462825  |               | methyltransferase                                           |
| +      | 464415  | 464984  |               | acetyltransferase                                           |
| -      | 469098  | 469877  |               | hypothetical protein                                        |
| +      | 470877  | 472316  |               | ATP-dependent RNA helicase                                  |
| -      | 488413  | 488649  |               | BioY family protein                                         |
| -      | 539128  | 539505  |               | putative phosphoesterase                                    |
| -      | 539683  | 539988  |               | putative phosphoesterase                                    |
| +      | 615022  | 615345  |               | ABC transporter ATP-binding protein                         |
| +      | 633557  | 634000  |               | hypothetical protein                                        |
| +      | 640188  | 640706  |               | hydrolase                                                   |
| +      | 640663  | 641187  |               | hydrolase                                                   |
| +      | 655947  | 656591  |               | sugar transporter                                           |
| +      | 752788  | 753069  |               | GBSi1, group II intron, maturase                            |
| +      | 795967  | 796656  |               | cell wall surface anchor family protein                     |
| +      | 883664  | 883984  | <i>glgD_1</i> | glucose-1-phosphate adenylyltransferase, GlgD subunit       |
| +      | 920583  | 920864  |               | GBSi1, group II intron, maturase                            |
| +      | 937667  | 937927  |               | hypothetical protein                                        |
| +      | 982348  | 983121  |               | hypothetical protein                                        |
| +      | 985909  | 986181  |               | hypothetical protein                                        |
| +      | 986460  | 987221  |               | hypothetical protein                                        |
| +      | 987855  | 988880  |               | hypothetical protein                                        |
| +      | 995376  | 995651  |               | Tn916 ORF13 protein                                         |
| +      | 1000548 | 1001741 |               | site-specific recombinase, phage integrase family           |
| -      | 1007872 | 1008051 |               | PnkB-like serine/threonine kinase protein                   |
| -      | 1045991 | 1046173 |               | iron-compound ABC transporter iron-compound-binding protein |

---

|   |         |         |               |                                                              |
|---|---------|---------|---------------|--------------------------------------------------------------|
| - | 1058271 | 1058648 |               | lipoprotein                                                  |
| - | 1059243 | 1059623 |               | lipoprotein                                                  |
| - | 1059665 | 1059931 |               | lipoprotein                                                  |
| - | 1059928 | 1060335 |               | hypothetical protein                                         |
| - | 1060298 | 1060531 |               | hypothetical protein                                         |
| - | 1060610 | 1061086 |               | hypothetical protein                                         |
| - | 1085752 | 1086408 |               | fibrinogen-binding protein                                   |
| - | 1122915 | 1123085 |               | short chain dehydrogenase/reductase oxidoreductase           |
| + | 1150593 | 1151021 |               | polysaccharide deacetylase                                   |
| - | 1152506 | 1153051 |               | transporter BCCT family protein                              |
| - | 1192339 | 1193307 | <i>cpsI_1</i> | capsular polysaccharide biosynthesis protein                 |
| - | 1193304 | 1194449 | <i>cpsL_2</i> | capsular polysaccharide polymerase                           |
| - | 1243644 | 1243907 |               | C4-dicarboxylate transporter/malic acid transport protein    |
| - | 1268236 | 1268517 |               | GBSi1, group II intron, maturase                             |
| - | 1275642 | 1276190 |               | hypothetical protein                                         |
| - | 1276287 | 1276517 |               | hypothetical protein                                         |
| + | 1276936 | 1277508 | <i>tnpA</i>   | transposase                                                  |
| + | 1285361 | 1286521 |               | hypothetical protein                                         |
| - | 1287829 | 1288638 |               | type II restriction enzyme (Eco47II, Sau96I)                 |
| - | 1288639 | 1289640 | <i>dcm</i>    | DNA (cytosine-5-)-methyltransferase                          |
| - | 1326896 | 1327093 |               | acetyltransferase                                            |
| - | 1366044 | 1366211 |               | hypothetical protein                                         |
| - | 1369052 | 1369816 | <i>secA</i>   | preprotein translocase subunit SecA                          |
| - | 1371446 | 1371991 | <i>asp3</i>   | accessory secretory protein                                  |
| - | 1408485 | 1408952 |               | sortase                                                      |
| - | 1409076 | 1409747 |               | hypothetical protein                                         |
| - | 1409737 | 1410612 |               | sortase                                                      |
| - | 1410650 | 1412158 |               | surface protein Spb1                                         |
| - | 1412199 | 1416503 |               | Cna B domain-containing protein                              |
| - | 1416523 | 1417092 | <i>lepB</i>   | signal peptidase I                                           |
| - | 1417076 | 1417348 |               | DNA repair ATPase                                            |
| - | 1436872 | 1437705 |               | IS861, transposase OrfB                                      |
| + | 1443788 | 1443937 |               | hypothetical protein                                         |
| - | 1458568 | 1459629 |               | hypothetical protein                                         |
| - | 1459735 | 1463892 |               | subtilisin-like serine protease                              |
| - | 1466187 | 1467107 |               | protease                                                     |
| + | 1476875 | 1478041 |               | IS30 family transposase                                      |
| - | 1509738 | 1510058 |               | peptide ABC transporter ATP-binding protein                  |
| + | 1522307 | 1523140 |               | IS861, transposase OrfB                                      |
| - | 1535827 | 1535928 |               | glyoxylase                                                   |
| - | 1557125 | 1557514 |               | D-isomer specific 2-hydroxyacid dehydrogenase family protein |
| - | 1626947 | 1627651 |               | hypothetical protein                                         |
| - | 1628312 | 1629265 |               | ketopantoate reductase PanE/ApbA superfamily protein         |
| - | 1629396 | 1629596 |               | hypothetical protein                                         |
| - | 1629606 | 1629959 |               | DNA/RNA non-specific endonuclease                            |
| - | 1630026 | 1630301 |               | hypothetical protein                                         |
| - | 1630337 | 1630450 |               | hypothetical protein                                         |
| - | 1635862 | 1636035 |               | MerR family transcriptional regulator                        |
| - | 1760007 | 1760450 |               | lipase                                                       |
| - | 1892744 | 1892917 |               | bacteriocin                                                  |
| + | 1946432 | 1946923 |               | sensor histidine kinase                                      |
| + | 1950431 | 1951597 |               | IS30 family transposase                                      |
| - | 2044819 | 2044989 |               | LysM domain-containing protein                               |

---

Table S5. Genes unique to NGBS357 (ST1).

| Start  | Stop   | Gene         | Product                                                        |
|--------|--------|--------------|----------------------------------------------------------------|
| 62226  | 62459  |              | hypothetical protein                                           |
| 240407 | 241627 |              | integrase                                                      |
| 241688 | 241948 |              | DNA-binding protein                                            |
| 241960 | 242706 |              | Rep protein                                                    |
| 243664 | 244197 |              | hypothetical protein                                           |
| 244197 | 244535 |              | hypothetical protein                                           |
| 244718 | 245647 |              | XRE family transcriptional regulator                           |
| 245644 | 245910 |              | hypothetical protein                                           |
| 246056 | 247957 | <i>sthIM</i> | type III restriction-modification system methylation subunit   |
| 247950 | 250649 | <i>sthIR</i> | DNA endonuclease, type III restriction and modification system |
| 329195 | 329602 |              | histidine kinase                                               |
| 569802 | 570005 |              | phage protein                                                  |
| 570108 | 570665 |              | Region found in RelA/SpoT proteins                             |
| 570667 | 571398 |              | Repressor protein                                              |
| 571771 | 571914 |              | hypothetical protein                                           |
| 571911 | 572135 |              | hypothetical protein                                           |
| 572194 | 572352 |              | phage protein                                                  |
| 572393 | 572530 |              | hypothetical protein                                           |
| 572499 | 573194 |              | hypothetical protein                                           |
| 573249 | 573458 |              | phage protein                                                  |
| 573447 | 573833 |              | phage protein                                                  |
| 573907 | 574125 |              | DNA-binding phage protein                                      |
| 574136 | 574930 |              | antirepressor                                                  |
| 574963 | 575223 |              | phage protein                                                  |
| 575158 | 575964 |              | phage protein                                                  |
| 576014 | 576157 |              | hypothetical protein                                           |
| 576105 | 576440 |              | hypothetical protein                                           |
| 576585 | 576770 |              | DNA-binding phage protein                                      |
| 576843 | 577073 |              | hypothetical protein                                           |
| 577977 | 578759 |              | phage DNA replication protein                                  |
| 578886 | 579161 |              | hypothetical protein                                           |
| 579148 | 579402 |              | phage protein                                                  |
| 579567 | 580520 |              | Recombinational DNA repair protein RecT (prophage associated)  |
| 580517 | 581314 |              | phage protein                                                  |
| 581483 | 581824 |              | phage protein                                                  |
| 581821 | 582333 |              | phage protein                                                  |
| 582320 | 582517 |              | phage protein                                                  |
| 582511 | 582795 |              | phage protein                                                  |
| 582792 | 583061 |              | phage protein                                                  |
| 583075 | 583491 |              | phage protein                                                  |
| 583776 | 583919 |              | hypothetical protein                                           |
| 583916 | 584428 |              | phage protein                                                  |
| 584449 | 584748 |              | phage membrane protein                                         |
| 584766 | 584939 |              | phage protein                                                  |
| 584936 | 585130 |              | hypothetical protein                                           |
| 585127 | 585393 |              | phage protein                                                  |
| 585788 | 586213 |              | phage protein                                                  |
| 587036 | 587392 |              | phage protein                                                  |
| 587389 | 588657 |              | structural phage protein                                       |
| 588650 | 589870 |              | phage protein                                                  |
| 589870 | 590058 |              | hypothetical protein                                           |
| 590167 | 591582 |              | phage terminase                                                |
| 591663 | 592127 |              | phage protein                                                  |
| 592130 | 593032 |              | prophage LambdaSa1, structural protein                         |
| 593029 | 593244 |              | phage protein                                                  |

---

|         |         |                |                                                                       |
|---------|---------|----------------|-----------------------------------------------------------------------|
| 593258  | 593680  |                | phage protein                                                         |
| 593640  | 593978  |                | phage protein                                                         |
| 593971  | 594207  |                | phage protein                                                         |
| 594208  | 594543  |                | phage protein                                                         |
| 594553  | 595110  |                | prophage LambdaSa1, structural protein                                |
| 595110  | 595355  |                | phage protein                                                         |
| 595370  | 595741  |                | phage protein                                                         |
| 595741  | 597753  |                | prophage LambdaSa1, pblA protein, internal deletion                   |
| 597747  | 599279  |                | prophage LambdaSa03, tail component                                   |
| 599280  | 603095  |                | prophage LambdaSa1, N-acetylmuramoyl-L-alanine amidase family protein |
| 603106  | 605118  |                | prophage LambdaSa1, minor structural protein                          |
| 605132  | 605458  |                | hypothetical protein                                                  |
| 605433  | 605645  |                | hypothetical protein                                                  |
| 605658  | 605960  |                | hypothetical protein                                                  |
| 608206  | 608715  | <i>int3_2</i>  | DNA integration/recombination/inversion protein                       |
| 636412  | 636891  |                | BFD-like [2Fe-2S] binding domain protein                              |
| 637479  | 638210  | <i>erm(TR)</i> | dimethyl adenosine transferase                                        |
| 638635  | 639324  |                | hypothetical protein                                                  |
| 639340  | 639723  |                | hypothetical protein                                                  |
| 639927  | 640370  |                | hypothetical protein                                                  |
| 640373  | 640702  |                | hypothetical protein                                                  |
| 641175  | 642155  |                | tyrosine recombinase XerC                                             |
| 642751  | 643905  |                | hypothetical protein                                                  |
| 644128  | 644484  |                | hypothetical protein                                                  |
| 644553  | 645149  |                | hypothetical protein                                                  |
| 645290  | 645463  |                | hypothetical protein                                                  |
| 645551  | 647224  |                | Phage integrase (Site-specific recombinase)                           |
| 984217  | 984855  | <i>inlA_2</i>  | putative internalin                                                   |
| 1104962 | 1106065 |                | DNA translocase FtsK                                                  |
| 1230142 | 1231899 |                | DNA polymerase III gamma and tau subunits C terminal                  |
| 1231905 | 1232588 |                | hypothetical protein                                                  |
| 1232585 | 1232911 |                | hypothetical protein                                                  |
| 1232889 | 1235885 |                | DNA polymerase III gamma and tau subunits C terminal                  |
| 1235931 | 1236227 |                | hypothetical protein                                                  |
| 1239355 | 1239531 |                | hypothetical protein                                                  |
| 1239528 | 1240226 |                | hypothetical protein                                                  |
| 1240352 | 1240594 |                | hypothetical protein                                                  |
| 1385509 | 1385724 |                | hypothetical protein                                                  |
| 1766681 | 1767058 |                | HAD superfamily hydrolase                                             |
| 1817239 | 1817613 |                | FMN-binding protein                                                   |
| 1837276 | 1838856 | <i>hsdM</i>    | type I restriction-modification system, M subunit                     |
| 1839480 | 1841252 |                | hypothetical protein                                                  |
| 1841390 | 1843375 | <i>tkt_2</i>   | transketolase                                                         |
| 1843424 | 1844068 |                | translaldolase                                                        |
| 1844086 | 1844775 |                | allulose-6-phosphate 3-epimerase                                      |
| 1844787 | 1845890 |                | PTS system fructose-specific transporter subunit IIC                  |
| 1845903 | 1846352 |                | PTS system fructose-specific transporter subunit IIA                  |
| 1846366 | 1846677 |                | PTS system fructose-specific transporter subunit IIB                  |
| 1846691 | 1848580 |                | PRD domain/PTS system IIA domain-containing protein                   |
| 1848791 | 1849018 |                | hypothetical protein                                                  |
| 1849051 | 1849350 |                | hypothetical protein                                                  |
| 1849361 | 1849534 |                | chromosome replication initiation inhibitor protein                   |
| 1849654 | 1849755 |                | short chain dehydrogenase                                             |
| 1850122 | 1850472 |                | short chain dehydrogenase                                             |
| 1850478 | 1851215 |                | 2,5-diketo-D-gluconate reductase A                                    |
| 1851748 | 1852278 |                | glutamate-rich protein GrpB                                           |
| 1852320 | 1853111 |                | PhzF family phenazine biosynthesis protein                            |
| 1853121 | 1853531 |                | acetyltransferase                                                     |

---

---

|         |         |             |                                       |
|---------|---------|-------------|---------------------------------------|
| 1856181 | 1856906 |             | MerR family transcriptional regulator |
| 1884220 | 1884669 |             | HIT family protein                    |
| 1991044 | 1992492 |             | PTS system transporter subunit IIC    |
| 2033128 | 2033436 |             | RNA-binding protein                   |
| 2034023 | 2034550 |             | membrane protein                      |
| 2034553 | 2034741 |             | transcriptional regulator             |
| 2039292 | 2039507 |             | hypothetical protein                  |
| 2040900 | 2041217 |             | hypothetical protein                  |
| 2041501 | 2041605 |             | hypothetical protein                  |
| 2041963 | 2042172 | <i>esxA</i> | virulence factor EsxA                 |
| 2042653 | 2042757 |             | hypothetical protein                  |
| 2042935 | 2043663 |             | hypothetical protein                  |
| 2043688 | 2043807 |             | hypothetical protein                  |
| 2043909 | 2044151 |             | DNA-damage-inducible protein J        |
| 2044131 | 2044250 |             | hypothetical protein                  |

---
